# Supplementary material for: The clinical efficacy and safety of equipment-assisted intravesical instillation of mitomycin C after transurethral resection of bladder tumour in patients with nonmuscular invasive bladder cancer: A meta-analysis
Source: PubMed Central journal article supplement (PMC9586381; doi:10.1371/journal.pone.0276453), 2022-10-21
Supplement: pone.0276453.s002.pdf [file pone.0276453.s002.pdf]

CNKI:

(( ( 主题%= 非肌层浸润性膀胱癌+表浅膀胱癌+浅表型膀胱肿瘤+非肌层浸润性膀胱肿瘤+浅表性膀胱癌+表浅层膀胱癌+表浅性膀胱癌 or 题名%= 非肌层浸润性膀胱癌+表浅膀胱癌+浅表型膀胱肿瘤+非肌层浸润性膀胱肿瘤+浅表性膀胱癌+表浅层膀胱癌+表浅性膀胱癌 ) AND ( 旧版主题= 随机对照试验+随机+对照 ) ) AND ( 主题%='丝裂霉素' or 题名%='丝裂霉素' ) ); 检索范围: 中文文献。

VIP:

((((((((题名或关键词=非肌层浸润性膀胱癌 OR 题名或关键词=superficial bladder cancer) OR 题名或关键词=表浅膀胱癌) OR 题名或关键词=浅表型膀胱肿瘤) OR 题名或关键词=非肌层浸润性膀胱肿瘤) OR 题名或关键词=浅表性膀胱癌) OR 题名或关键词=表浅层膀胱癌) OR 题名或关键词=表浅性膀胱癌) AND ((摘要=随机对照试验 OR 摘要=随机) OR 摘要=对照)) AND 题名或关键词=丝裂霉素)

WANFANG:

主题:(非肌层浸润膀胱癌+表浅膀胱癌+浅表型膀胱肿瘤+非肌层浸润性膀胱肿瘤+浅表性膀胱癌+表浅层膀胱癌+表浅性膀胱癌) and 主题:(丝裂霉素) and 摘要:(随机对照试验+随机+对照)

CBM:

| 序号 | 检索表达式                                                | 命中文献数 | 检索时间                  |
|----|------------------------------------------------------|-------|-----------------------|
| 1) | "膀胱肿瘤"[不加权:扩展]                                       | 78102 | 2022-04-12 18:25:18.0 |
| 2) | "膀胱癌"[常用字段:智能] OR "膀胱肿瘤"[常用字段:智能] OR "膀胱癌症"[常用字段:智能] | 94014 | 2022-04-12 18:38:14.0 |
| 3) | ("膀胱癌"[常用字段:智能] OR "膀胱肿瘤"[常用字段:智能] OR "膀胱癌症"[常用      |       |                       |

字段:智能]) OR ("膀胱肿瘤"[不加权:扩展]) 94014 2022-04-12 18:38:43.0

4) "浅表"[常用字段:智能] OR "非肌层"[常用字段:智能] 21896 2022-04-12 18:41:14.0

5) ("浅表"[常用字段:智能] OR "非肌层"[常用字段:智能]) AND (("膀胱癌"[常用字段:智能] OR "膀胱肿瘤"[常用字段:智能] OR "膀胱癌症"[常用字段:智能]) OR ("膀胱肿瘤"[不加权:扩展])) 3224 2022-04-12 18:41:35.0

6) "丝裂霉素"[不加权:扩展] 15499 2022-04-12 18:45:42.0

7) "丝裂霉素 C"[常用字段:智能] 27584 2022-04-12 19:11:24.0

8) ("丝裂霉素 C"[常用字段:智能]) OR ("丝裂霉素"[不加权:扩展]) 27584 2022-04-12 19:11:36.0

9) "随机对照试验"[不加权:扩展] 499796 2022-04-12 19:12:37.0

10) "随机"[常用字段:智能] OR "对照"[常用字段:智能] 3445358 2022-04-12 19:12:52.0

11) ("随机"[常用字段:智能] OR "对照"[常用字段:智能]) OR ("随机对照试验"[不加权:扩展]) 3445358 2022-04-12 19:13:05.0

12) (("随机"[常用字段:智能] OR "对照"[常用字段:智能]) OR ("随机对照试验"[不加权:扩展])) AND (("丝裂霉素 C"[常用字段:智能]) OR ("丝裂霉素"[不加权:扩展])) AND (("浅表"[常用字段:智能] OR "非肌层"[常用字段:智能]) AND (("膀胱癌"[常用字段:智能] OR "膀胱肿瘤"[常用字段:智能] OR "膀胱癌症"[常用字段:智能]) OR ("膀胱肿瘤"[不加权:扩展]))) 144 2022-04-12 19:13:41.0

Pubmed:

("placebo"[Title/Abstract] OR "randomized"[Title/Abstract] OR "rct"[Title/Abstract] OR "Randomized Controlled Trial"[Publication Type]) AND ("Mitomycin-C"[Title/Abstract] OR "Mitomycin-C"[Title/Abstract] OR "Mitocin-C"[Title/Abstract] OR "Mitocin-C"[Title/Abstract] OR "NSC-26980"[Title/Abstract] OR "NSC-26980"[Title/Abstract] OR "NSC26980"[Title/Abstract] OR "Ametycine"[Title/Abstract] OR "Mutamycin"[Title/Abstract] OR "Mitomycin"[MeSH Terms]) AND (("non-muscle-invasive"[Title/Abstract] OR "superficial"[Title/Abstract] OR "nmibc"[Title/Abstract]) AND ("neoplasm urinary bladder"[Title/Abstract] OR "urinary bladder neoplasm"[Title/Abstract] OR "bladder tumors"[Title/Abstract] OR "bladder tumor"[Title/Abstract] OR "tumor bladder"[Title/Abstract] OR "tumors bladder"[Title/Abstract] OR "neoplasms bladder"[Title/Abstract] OR "bladder neoplasms"[Title/Abstract] OR "bladder neoplasm"[Title/Abstract] OR "neoplasm bladder"[Title/Abstract] OR "urinary bladder cancer"[Title/Abstract] OR "cancer urinary bladder"[Title/Abstract] OR "malignant tumor of urinary bladder"[Title/Abstract] OR "cancer of the bladder"[Title/Abstract] OR "bladder cancer"[Title/Abstract] OR "bladder cancers"[Title/Abstract] OR "cancer bladder"[Title/Abstract] OR "cancer of bladder"[Title/Abstract] OR "Urinary Bladder Neoplasms"[MeSH Terms]))

Embase:

Session Results

| No.  | Query Results                                                                                                                                                                                                                                                                                                                                                                                                                                                                                                                                                      | Results   | Date        |
|------|--------------------------------------------------------------------------------------------------------------------------------------------------------------------------------------------------------------------------------------------------------------------------------------------------------------------------------------------------------------------------------------------------------------------------------------------------------------------------------------------------------------------------------------------------------------------|-----------|-------------|
| #12. | #5 AND #8 AND #11                                                                                                                                                                                                                                                                                                                                                                                                                                                                                                                                                  | 348       | 12 Apr 2022 |
| #11. | #9 OR #10                                                                                                                                                                                                                                                                                                                                                                                                                                                                                                                                                          | 1,295,988 | 12 Apr 2022 |
| #10. | 'placebo':ab,ti OR 'randomized':ab,ti OR 'rct':ab,ti                                                                                                                                                                                                                                                                                                                                                                                                                                                                                                               | 1,055,669 | 12 Apr 2022 |
| #9.  | 'randomized controlled trial'/exp                                                                                                                                                                                                                                                                                                                                                                                                                                                                                                                                  | 708,157   | 12 Apr 2022 |
| #8.  | #6 OR #7                                                                                                                                                                                                                                                                                                                                                                                                                                                                                                                                                           | 50,937    | 12 Apr 2022 |
| #7.  | 'mitomycin c':ab,ti OR 'mitomycin-c':ab,ti OR 'mitocin-c':ab,ti OR 'mitocin c':ab,ti OR 'mitocinc':ab,ti OR 'nsc-26980':ab,ti OR 'nsc 26980':ab,ti OR 'nsc26980':ab,ti OR 'ametycine':ab,ti OR 'mutamycin':ab,ti                                                                                                                                                                                                                                                                                                                                                   | 19,261    | 12 Apr 2022 |
| #6.  | 'mitomycin'/exp                                                                                                                                                                                                                                                                                                                                                                                                                                                                                                                                                    | 48,225    | 12 Apr 2022 |
| #5.  | #3 AND #4                                                                                                                                                                                                                                                                                                                                                                                                                                                                                                                                                          | 12,940    | 12 Apr 2022 |
| #4.  | 'non-muscle- invasive':ab,ti OR 'superficial':ab,ti OR 'nmibc':ab,ti                                                                                                                                                                                                                                                                                                                                                                                                                                                                                               | 139,448   | 12 Apr 2022 |
| #3.  | #1 OR #2                                                                                                                                                                                                                                                                                                                                                                                                                                                                                                                                                           | 109,926   | 12 Apr 2022 |
| #2.  | 'neoplasm, urinary bladder':ab,ti OR 'urinary bladder neoplasm':ab,ti OR 'bladder tumors':ab,ti OR 'bladder tumor':ab,ti OR 'tumor, bladder':ab,ti OR 'tumors, bladder':ab,ti OR 'neoplasms, bladder':ab,ti OR 'bladder neoplasms':ab,ti OR 'bladder neoplasm':ab,ti OR 'neoplasm, bladder':ab,ti OR 'urinary bladder cancer':ab,ti OR 'cancer, urinary bladder':ab,ti OR 'malignant tumor of urinary bladder':ab,ti OR 'cancer of the bladder':ab,ti OR 'bladder cancer':ab,ti OR 'bladder cancers':ab,ti OR 'cancer, bladder':ab,ti OR 'cancer of bladder':ab,ti | 64,367    | 12 Apr 2022 |
| #1.  | 'bladder tumor'/exp                                                                                                                                                                                                                                                                                                                                                                                                                                                                                                                                                | 103,073   | 12 Apr 2022 |

Cochrane:

Date Run: 12/04/2022 19:15:13

Comment:

ID Search Hits

#1 MeSH descriptor: [Urinary Bladder Neoplasms] explode all trees 1597

#2 (Neoplasm, Urinary Bladder):ti,ab,kw or (Urinary Bladder Neoplasm):ti,ab,kw or (Bladder Tumors):ti,ab,kw or (Bladder Tumor):ti,ab,kw or (Tumor, Bladder):ti,ab,kw or (Tumors, Bladder):ti,ab,kw or (Neoplasms, Bladder):ti,ab,kw or (Bladder Neoplasms):ti,ab,kw or (Bladder Neoplasm):ti,ab,kw or (Neoplasm, Bladder):ti,ab,kw or (Urinary Bladder Cancer):ti,ab,kw or (Cancer, Urinary Bladder):ti,ab,kw or (Malignant Tumor of Urinary Bladder):ti,ab,kw or (Cancer

of the Bladder):ti,ab,kw or (Bladder Cancer):ti,ab,kw or (Bladder Cancers):ti,ab,kw or (Cancer, Bladder):ti,ab,kw or (Cancer of Bladder):ti,ab,kw 5700

#3 #1 or #2 5700

#4 (non-muscle-invasive):ti,ab,kw or (superficial):ti,ab,kw or (nmibc):ti,ab,kw 8418

#5 #4 and #3 1379

#6 MeSH descriptor: [Mitomycins] explode all trees 1319

#7 (Mitomycin C):ti,ab,kw or (Mitomycin-C):ti,ab,kw or (Mitocin-C):ti,ab,kw or (Mitocin C):ti,ab,kw or (MitocinC):ti,ab,kw or (NSC-26980):ti,ab,kw or (NSC 26980):ti,ab,kw or (NSC26980):ti,ab,kw or (Ametycine):ti,ab,kw or (Mutamycin):ti,ab,kw 2238

#8 #7 OR #6 2594

#9 #8 AND #5 296
